# Supplementary material
Source: PubMed Central journal article supplement (PMC6692696)
Supplement: jamapediatr-173-931-s001.pdf [file jamapediatr-173-931-s001.pdf]

1  
2  
3  
4  
5  
6  
7  
8  
9  
10  
11  
12  
13  
14  
15  
16  
17  
18  
19  
20  
21  
22  
23  
24  
25  
26  
27  
28  
29  
30  
31  
32  
33  
34  
35  
36  
37  
38  
39  
40  
41  
42  
43  
44  
45  
46

**Protocol and Appendices (Main Outcomes, Power Calculations and SAP)**

Protocol for: Changing Pediatric Office Systems Nationally to Address Parental Tobacco Use

PI: Jonathan P. Winickoff MD, MPH

## TABLE OF CONTENTS

|    |                                                        |    |
|----|--------------------------------------------------------|----|
| 47 |                                                        |    |
| 48 |                                                        |    |
| 49 | 1. INTRODUCTION                                        |    |
| 50 | 1.1 SUMMARY OF GENERAL BACKGROUND.....                 | 3  |
| 51 | 1.2 SIGNIFICANCE.....                                  | 3  |
| 52 | 2. STUDY DESIGN AND METHODS.....                       | 4  |
| 53 | 3. SPECIFIC AIMS AND HYPOTHESIS.....                   | 5  |
| 54 | 4. STUDY END POINTS.....                               | 5  |
| 55 | 5. KEY PROCEDURES OF THE STUDY                         |    |
| 56 | 5.1 OVERALL PROCEDURES.....                            | 6  |
| 57 | 5.2 CEASE INTERVENTION.....                            | 7  |
| 58 | 5.3 RESEARCH ASPECT.....                               | 8  |
| 59 | 6. RECRUITMENT PROCEDURES                              |    |
| 60 | 6.1 SUBJECT RECRUITMENT.....                           | 9  |
| 61 | 6.2 PRACTICE RECRUITEMENT.....                         | 10 |
| 62 | 7. ADHERENCE TO EDTHICAL GUIDELINES                    |    |
| 63 | 7.1 CONSENT PROCEDURES                                 |    |
| 64 | 7.1.1 PARENTS.....                                     | 11 |
| 65 | 7.1.2 PEDIATRIC CLINICIANS.....                        | 12 |
| 66 | 7.2 FORESEEABLE RISKS AND DISCOMFORT.....              | 13 |
| 67 | 7.3 EXPECTED BENEFITS.....                             | 14 |
| 68 | 7.4 EQUITABLE SELECTION OF SUBJECTS.....               | 14 |
| 69 | 8. DATA AND SAFETY MONITORING                          |    |
| 70 | 8.1 SAFETY MONITORING.....                             | 15 |
| 71 | 8.2 MONITORING AND QUALITY ASSURANCE.....              | 16 |
| 72 | 8.3 PRIVACY AND CONFIDENTIALITY.....                   | 16 |
| 73 | 8.4 SPECIMENS                                          |    |
| 74 | 8.4.1 SENDING SPECIMENS/DATA TO RESEARCH COLLABORATORS |    |
| 75 | OUTSIDE .....                                          | 16 |
| 76 | 8.4.2 RECEIVING SPECIMENS/DATA FROM RESEARCH           |    |
| 77 | COLLABORATORS OUTSIDE PARTNERS.....                    | 16 |
| 78 | 9. REFERENCES.....                                     | 17 |
| 79 |                                                        |    |
| 80 | APPENDIX 1: MAIN OUTCOMES MEASUREMENT                  |    |
| 81 | APPENDIX 2: POWER CALCULATIONS                         |    |
| 82 | APPENDIX 3: STATISTICAL ANALYSES                       |    |
| 83 |                                                        |    |
| 84 |                                                        |    |
| 85 |                                                        |    |
| 86 |                                                        |    |
| 87 |                                                        |    |
| 88 |                                                        |    |
| 89 |                                                        |    |
| 90 |                                                        |    |
| 91 |                                                        |    |
| 92 |                                                        |    |
| 93 |                                                        |    |
| 94 |                                                        |    |

95 **1. INTRODUCTION**

96  
97 **1.1. Summary of general background**

98 1. Parental smoking is associated with poor health outcomes for children, spouses, and the  
99 smoking parent. 2. Proven tobacco control strategies exist for smokers in this age group. 3.  
100 Parental smokers have more frequent contact with the child’s clinician than with any other  
101 healthcare clinician, including their own. 4. Effective strategies for parental tobacco control  
102 are currently not implemented in the pediatric outpatient setting. In this study, we will test a  
103 previously developed, pilot tested, and theoretically based parental tobacco control  
104 intervention for effectiveness within a large outpatient pediatric research network.  
105

106 **1.2 Significance** In this study we will test a previously developed, theoretically based, pilot-  
107 tested, and effectively implemented parental tobacco control intervention for overall  
108 effectiveness, cost per quit, and factors that affect sustainability of the intervention within the  
109 largest association of pediatric care providers. Our detailed process evaluation at the clinician  
110 level, the patient behavior level, and practice systems level will add substantially to the  
111 compilation of essential elements in the national tobacco control strategy for pediatric healthcare  
112 settings. The multilevel approach will inform science and theory in tobacco control and public  
113 health by identifying how and for whom the intervention works and by providing an integrated  
114 and sustainable systems change template for pediatric practices nationally. The generalizable  
115 intervention model, meeting the new quality improvement recertification requirement, can spread  
116 rapidly across child health care settings to help families eliminate tobacco use and maximize  
117 population impact.  
118

119 **Helping parents quit smoking is a national priority:** Quitting smoking adds an average of  
120 seven years to a parent’s life,<sup>1</sup> eliminates the majority of their children’s tobacco smoke exposure  
121 (TSE),<sup>2-4</sup> eliminates smoking-related poor pregnancy outcomes for all future pregnancies,<sup>5</sup>  
122 addresses the primary cause of house fire mortality,<sup>6,7</sup> decreases the accessibility of cigarettes  
123 and odds that teens become smokers,<sup>8-10</sup> and improves the financial resources of disadvantaged  
124 families.<sup>11</sup> The child’s health clinic provides the best and sometimes only access to the  
125 healthcare system for parents who smoke. Parents who smoke are often underserved medically,  
126 but see their child’s doctor an average of four times each year,<sup>12</sup> significantly more than they  
127 themselves see a clinician.<sup>13-16</sup>  
128

129 **The effectiveness of smoking cessation strategies used in this study and in this context is**  
130 **well established.** According to the most recent meta-analyses from the Tobacco Dependence  
131 Treatment Update in 2008,<sup>17</sup> the effectiveness of physician counseling alone shows an odds ratio  
132 (OR) for quitting of 2.2 [1.5-3.2](95%CI) and a quit rate of 19.9% [13.7-26.2], the quitline alone  
133 shows an OR of 1.6 [1.4-1.8] and a cessation rate of 12.7% [11.3-14.2], and combination NRT  
134 patch and *ad lib* NRT gum medications as proposed in this study shows an OR of 3.6 [2.5-5.2]  
135 and a cessation rate of 36.5% [26.6-45.3]. Moreover, the combination of these therapies has been  
136 demonstrated more effective than individual components alone. In addition, a meta-analysis  
137 recently demonstrated the effectiveness of parental smoking cessation initiated in the pediatric  
138 context.<sup>18</sup> However, despite this evidence, effective strategies for parental tobacco control are  
139 currently not implemented in the pediatric outpatient setting, and almost nothing is done to help  
140 parents quit smoking in this clinical context, despite overwhelming evidence that a child’s visit  
141 to the doctor provides a teachable moment for parental smoking cessation.<sup>19-21</sup> Our team has  
142 shown that parents accept smoking cessation medications and quitline enrollment in this clinical  
143 context.<sup>22,23</sup>

144 Our Phase 1 research study was the first large scale demonstration of effectively  
145 implemented tobacco dependence treatment for parents in the pediatric context (see preliminary  
146 studies C2). Critical next steps include studying implementation in a nationally generalizable  
147 context of pediatric practices, measurement of institutional sustainability,<sup>24</sup> and cost-  
148 effectiveness.<sup>25</sup>

149  
150 **Essential national environmental factors external to the practices are now in place to**  
151 **maximize the potential for sustained practice change, i.e. institutional sustainability, with**  
152 **this intervention.** These features are: (1) an available smoking cessation quitline in every state;<sup>26</sup>  
153 (2) publically covered cessation medication;<sup>27</sup> (3) required continuing medical education (CME)  
154 project addressing quality improvement in order to obtain pediatric recertification;<sup>28</sup> (4)  
155 development of our on-line intervention training module that meets these recertification  
156 requirements;<sup>28</sup> and (5) a social climate where it is acceptable and even expected that parents  
157 receive cessation support from any healthcare clinician.<sup>22,23</sup> In studying the sustainability of this  
158 intervention, we will be maximizing the long-term deployment of the intervention and  
159 contributing to the science of sustainability for other preventive services.<sup>29</sup>

## 160 161 **2. STUDY DESIGN AND METHODS**

162  
163 The proposed study is a cluster randomized controlled trial designed to test the effectiveness  
164 and sustainability of a previously developed, tested, and theoretically based tobacco control  
165 strategy—the Clinical Effort Against Secondhand Smoke Exposure (CEASE) intervention.

166  
167 Through the American Academy of Pediatrics (AAP), pediatric practices meeting study  
168 inclusion criteria will be contacted for assessing eligibility. Practices must be located in a  
169 community-based setting with a non-institutionalized population. Participating practices will  
170 need to have 1. A minimum of 4 FTE Pediatricians 2. Self-described practice smoking rate of  
171 at least 15%. 3. Average patient flow of 50 families per day/2000 families total. 4. Agreement  
172 by all clinicians in the practice to introduce a practice-wide module for systemically  
173 addressing parental tobacco use (CEASE). 5. Current use of Electronic Health Records system  
174 6. Willingness to set up and use a Disease Registry 7. Willingness to have a Research  
175 Assistant in the office setting 6. A working fax machine. 7. Adequate geographical distance  
176 from other participating practices to minimize contamination effects. 8. Practices cannot have  
177 taken part in Phase 2 focus groups or other pilot tobacco control studies. 9. Practices must not  
178 be actively enrolling patients into other AAP trials. Practices will be eligible if they saw a  
179 minimum of nine smoking families (proxy for parent smoking rate) and a minimum of 40  
180 families per day (proxy for practice flow rate).

181  
182 Eligibility criteria for parents/guardians to participate in the study include that they have  
183 smoked a single cigarette, even a puff, in the past 7 days or have quit smoking in the past 2  
184 years; are accompanying a child being seen at the participating practice; have adequate  
185 English to respond to written surveys; and be at least 18 years of age. We will enroll a total of  
186 approximately 200 parents in each practice from 10 practices (5 intervention, 5 control) at  
187 both the baseline and 24 month time points for a cumulative total of 4000 enrolled parents.  
188 We expect that practices will be differentially productive for parent enrollment, and will  
189 replace practices that do not enroll 200 parents with practices from the replacement group in  
190 the same state stratified and randomized according to practice size and parental smoking rate.

192 At the end of parent/guardian data collection in intervention practices, the practice leader and  
193 a key office staff member (office manager, administrator, secretary) will be qualitatively  
194 interviewed by telephone to gather data on the implementation process. This interview will  
195 take approximately 60 minutes. It will be recorded and transcribed.

### 196 **3. SPECIFIC AIMS AND HYPOTHESIS**

#### 197 **Aim 1. To implement and sustain adherence to tobacco-control guidelines at the clinical** 198 **level;**

201 **H1.** Rates of the following clinical actions, assessed by exit survey at baseline (post-  
202 implementation) and 2 years will be sustained at a greater level in the intervention  
203 practices than in controls at 2 years;

- 204 • Delivery of cessation assistance, defined as prescribing medication, or
- 205 enrolling in the quitline or other program (Primary outcome for Aim 1);
- 206 • Clinician asking and advising about parental smoking and smoke-free homes
- 207 and cars.

#### 208 **Aim 2. To facilitate behavior change among parents and evaluate cost per quit among** 209 **parents who smoke;**

211 **H2.** Rates of the following parent behaviors, as assessed by the Exit Survey at baseline  
212 and 2 years, will be greater in intervention practices than in usual care control practices:

- 213 • Change in practice prevalence of parents who smoke assessed at baseline and
- 214 at 2 years;
- 215 • Change in quit rate at the practice: quit in the last 2 years, cotinine-confirmed
- 216 at baseline and at 2 years;
- 217 • Reduced parental smoking inside homes and cars assessed by previously
- 218 validated, self-reported strictly enforced rules prohibiting smoking in the
- 219 home and car;
- 220 • Use of services from any smoking cessation program (e.g. quitline)
- 221 • Use of pharmacotherapy (any source)

#### 222 **Aim 3. To study systems changes and the processes that affect them at the practice level.**

224 **H3.** Leadership support, EHR integration, program institutionalization, and  
225 environmental factors (quitline accessibility, billing for services) will correlate with  
226 delivery of cessation assistance, as assessed by post-implementation qualitative  
227 interviews with practice leaders and key office staff. These interviews will be guided by  
228 an interview guide, which has been tailored from the Consolidated Framework for  
229 Implementation Research (CFIR).

### 230 **4. STUDY ENDPOINTS**

231 Intervention and control groups will be compared on the following:

#### 232 **Practice based:**

- 233 1. Clinician asking parents about their smoking, as well as clinician delivery of tobacco control
- 234 advice and services for cessation (primary outcome);
- 235 2. Clinician counseling for institution of strict rules against smoking in the home and car;
- 236
- 237
- 238

- 239 **Parent behavior based:**  
240 3. Change in prevalence of parents who smoke by condition from baseline to 2 years (self-  
241 reported at baseline and 2 years);  
242 4. Change in parental 7-day abstinence, cotinine-confirmed from baseline to 2 years;  
243 5. Parental quit attempts lasting at least 24 hours;  
244 6. Parental use of pharmacotherapy for smoking cessation;  
245 7. Parental use of services from any smoking cessation program (e.g. quitline);  
246 8. Reduced parental smoking inside homes and cars.

247

## 248 **5. KEY PROCEDURES OF THE STUDY**

249

### 250 **5.1 Overall procedures**

251 **a.** Practices will be contacted through clinician membership in the AAP using its routine field-  
252 tested methodology and techniques.

253 **b.** For practices that say yes to recruitment, meet initial inclusion criteria, and return the

254 Participation Form indicating agreement to confirm their practice smoking rate

255 (approximately 30), AAP staff will send copies of the Practice Population Survey (PPS) to  
256 practice staff and train staff in its administration. It will be administered to consecutive patient  
257 families over 3 days. The PPS will assess health behaviors, including tobacco use, of parents,  
258 so that smoking rates of parents can be used as an inclusion criterion. Completed surveys will  
259 be mailed to MGH within 1 week of completion, where they will be tabulated by MGH staff  
260 to determine parent smoking and flow rates. Practices will be eligible if they saw a minimum  
261 of nine smoking families (proxy for parent smoking rate) and a minimum of 40 families per  
262 day (proxy for practice flow rate).

263 **c.** Based on the results of the PPS, a total of 18 practices will be recruited from 6 different states  
264 and asked to consent to participate in the study. Practices will be assigned to one of three groups:  
265 1. The CEASE intervention (5 practices) 2. Usual care control (5 practices), or 3. Replacement (8  
266 practices). In 5 different states, a pair (2) of practices that meet inclusion criteria for parent  
267 enrollment are matched on parent smoking rate and practice size. Each pair (10 practices total)  
268 will then be randomized to receive either 1. The CEASE intervention or 2. Usual care control.  
269 The remaining practices (those that were not matched for randomization) will be assigned to the  
270 replacement group. This includes 1 practice per active state and 3 practices in an additional, non-  
271 active state. Practices that fail to meet parent enrollment goals will be replaced with a  
272 replacement practice that also met the study inclusion criteria (i.e. baseline smoking rate and  
273 having at least 4 FTE pediatricians).

274 **d.** The practice leader is self-identified on the Participation Form the practice returns in  
275 response to the letter of invitation from to the APP to administer the Practice Population  
276 Survey (PPS) to confirm that the practice has a parent smoking rate  $\geq 15\%$ . Based on the  
277 results of the PPS, all clinicians (defined in the context of this study as anyone who sees their  
278 own patient panel such as a MD, Nurse Practitioner, or Physician's Assistant) and practice  
279 staff (including RNs and those interacting with patients) at participating practices will be  
280 required to agree to have the intervention take place in the practice. The completed  
281 Participation Form from the practice leader will attest to the agreement of all clinicians at the  
282 practice to hold the intervention in the office and will contain a list of those clinicians that  
283 wish to participate in the intervention and receive MOC through the online module.

284 **e.** In the intervention group, practice leaders will complete regular practice feedback before  
285 training in the intervention (baseline) and at regular intervals after enrollment has begun  
286 through the online module.

287 **f.** Control and intervention practices will be trained in integrating a Research Assistant (RA)  
288 who will be hired, trained, and paid by the research study for data collection. Research  
289 Assistants will be recruited in the practice sites' local areas through networking, temporary  
290 office-service contractors, and other local resources.

291 **g.** A notice to parents will be posted where all can see it when registering for their pediatric  
292 visit. The notice announces that the practice is participating in a research study and that  
293 parents/guardians may be approached by a study RA on their way out of the office. Practice  
294 staff will follow a script at the check-out desk to refer parents to the RA for the Eligibility  
295  Screener.

296 **h.** Clinician training will be carried out through an online module through the American  
297 Academy of Pediatrics' EQIPP system. The time of training will depend on the practice's  
298 assignment to either the control, intervention, or replacement arm. Access to the online module  
299 will be provided to the control and replacement groups at the conclusion of the research study.  
300 Specific features of the CEASE intervention that will be migrated to the EQIPP module include:  
301 materials that prompt delivery of the brief 3-step process (Ask, Assist, Refer), systematic and  
302 proactive enrollment of parental smokers in telephone counseling at the quitline that will follow-  
303 up on clinician's advice to quit; explicit counseling of parents on the importance of strictly  
304 enforced smoking prohibitions within the home and car; and prescription of nicotine replacement  
305 therapy (NRT) for parental smokers in the context of the child's healthcare visit. The CEASE  
306 intervention follows the Public Health Service Guidelines by incorporating these evidence-based  
307 tobacco control treatments and practices. Intervention practices will be trained over an 8-week  
308 period of time in implementation of the CEASE intervention; control practices will continue  
309 their routine care until 24 months after they have completed enrollment of parents for the study.  
310 Then, they will receive access to the online CEASE module. In order to ensure security of any  
311 information collected through the online course, clinicians will be given an informational sheet  
312 on how to manage their account settings (profiles, privacy) and how to deactivate their accounts  
313 if they so choose. They will also be given the option to complete training through a de-  
314 identified account. Additional tobacco control training will be offered to intervention practices,  
315 as a supplement to the CEASE training described above. Up to two individuals per practice  
316 identified by the practice leader will be given the opportunity to take the "Basic Skills for  
317 Working With Smokers" online course from University of Massachusetts Medical School Center  
318 for Tobacco Treatment Research and Training free of charge and paid for by the study. CEUs  
319 are available for RNs (14.4), Certified Health Education Specialists (12), Social Workers (12),  
320 Respiratory Therapists (12), Registered Dental Hygienists (12), Certified Substance Abuse  
321 Counselors (CADAC/CAC/LADC) (11) and a general certificate of completion (12) for all other  
322 participants.

323

324 During their pediatric office visit, parents will receive one of two conditions:

- 325 1. **usual care control**, consisting of whatever the specific clinicians usually do for parental  
326 tobacco control; or
- 327 2. **the CEASE intervention**.

328

329 **5.2. The CEASE Intervention** consists of a brief motivational message (based on information  
330 supplied by the parent in the CEASE Action Sheet) about tobacco use and SHS exposure  
331 delivered by the healthcare clinician, offer of enrollment in a free telephone quitline and a free  
332 text message cessation service, and receipt of a prescription for *covered* NRT for cessation.

333

334 When parents arrive at the office for their child's visit, they will check in at the front desk. While  
335 they check in, they will be presented with an iPad and asked to consent to a brief Intake Survey.

336 (The consent process is described in this application.) The data that parents enter into the Intake  
337 Survey (attached separately) is as follows: the first and last name of the youngest child being  
338 seen in the office that day, the name of the clinician being seen, and which member of the  
339 household uses tobacco (mother, father, patient, or other). Practices will be offered the option of  
340 having the Intake Survey appear on the iPad in both English and Spanish. If the practice would  
341 like the Intake Survey to appear in both English and Spanish, the Spanish translation of the  
342 Intake Survey will be generated by a certified translation specialist. The Intake Survey will also  
343 contain links to embedded educational YouTube videos on tobacco cessation-related topics that  
344 can be viewed by parents who choose to view them; the videos will be offered with closed  
345 captioning for easier comprehension in waiting rooms. To help the CEASE research team  
346 evaluate which videos are most liked by parents who visit the practices, parents will be asked to  
347 provide a rating of the video on the iPad Intake Survey between 1 star (not good) and 4 stars  
348 (great). After the parent completes all questions, the office staff are asked to hand them a CEASE  
349 Action Sheet (part of the clinical intervention) and document the distribution of the CEASE  
350 Action Sheet on the Intake Survey. If the parent indicates he or she would like to be connected  
351 with the free state tobacco quitline on the Intake Survey, the office staff are prompted to hand the  
352 parent a tobacco quitline referral sheet and document the distribution of the tobacco quitline  
353 sheet on the Intake Survey. When available from the state's tobacco quitline, the iPad will  
354 include helpful information for parents who receive a tobacco quitline enrollment form about  
355 when to expect a call from the quitline and how the call will likely appear on their caller ID. Data  
356 from the Intake Survey will be electronically housed in a REDCap database accessible only by  
357 study staff at MGH. Each month, MGH staff will place this data into a practice-specific Intake  
358 Survey Report, organized by clinician name. This report will be sent no more than once a month  
359 via a password protected file from MGH study staff to a contact staff person within the practice  
360 who will be chosen by the practice leader. The contact person will be responsible for receiving  
361 the report and distributing it to each of the clinicians in the practice.

362  
363 The monthly Intake Survey Report functions as a supplement to the CEASE tobacco intervention  
364 performed by the clinician during the child's visit. Clinicians are provided with a list of the  
365 children in their care who live with a tobacco user. This list is a convenient resource for  
366 clinicians who may want to provide adjunct resources to tobacco users: instead of searching  
367 through individual medical records, the Intake Survey Report streamlines the process by listing  
368 all families who have consented to receive specialized tobacco services and resources. Practices  
369 will be free to use this list in the way that makes most sense for their office: there will not be a  
370 specific research protocol to follow. Rather, the list is intended as a flexible adjunct to the  
371 intervention. However, in order to help increase the utility of the Intake Survey Report, practices  
372 will be provided with suggested clinical interventions to perform with the families on the report.  
373 For example, one clinical intervention that will be suggested to practices is using the list to send  
374 parents letters that offer additional support and services for quitting tobacco.

375  
376 In order to assess the utility of the Intake Survey Report, the practice leader will participate in a  
377 monthly 5-minute follow-up with a member of the study team. During these follow-ups, the  
378 practice leader will be asked a series of follow-up questions about their practice's use of the  
379 Intake Survey Report, (attached separately). Data from these follow-up discussions will be  
380 logged in a secure database at the MGH and AAP sites.

### 381 382 **5.3. Research aspect**

383 After being seen by the pediatric clinician, the parent will be approached by the RA stationed  
384 near the exit of the practice for an exit interview consisting of the Eligibility Screener, and for



385 eligible parents, the Exit Survey. During the Eligibility Screener, parents will be asked for  
386 demographic information and screened for smoking status. If they say yes to either of the  
387 questions, “Have you smoked a cigarette in the past 7 days, even a puff?” or “Have you  
388 smoked a cigarette, even a puff, in the last 2 years?” and meet other eligibility requirements,  
389 they will qualify for study enrollment. Parents who agree to study participation will learn  
390 about the study, sign the consent, and complete the Exit Survey for enrolled  
391 parents/guardians.

392  
393 Biochemical validation of self-reported abstinence within the past 2 years will be obtained  
394 with parent consent by the RA at the completion of the Exit Survey at both time points  
395 (baseline and at 2 years) using saliva swabs that will be tested for the nicotine metabolite,  
396 cotinine.

397  
398 At the end of data collection, a key office staff member and the practice leader will be asked  
399 to individually participate in a qualitative interview. The qualitative interview will be  
400 conducted by phone by the CEASE implementation specialist. Before the qualitative  
401 interview begins, the respondents will be asked to review the CEASE Interview Information  
402 Sheet. The interview will begin with reviewing the CEASE Interview Information Sheet,  
403 including an explanation of the interview, highlighting the right of the respondent to stop the  
404 interview at any time or to skip any question. The respondents will also be informed of how  
405 their data will be used and the anonymization procedure. The respondent will be asked for  
406 permission to record the interview; this permission will be recorded. If no permission is given,  
407 the recording will stop immediately. The qualitative interview will be guided by the interview  
408 guide and will focus on the process of implementing CEASE in their practice.

## 409 410 **6. RECRUITMENT PROCEDURES**

411  
412  
413 **6.1 Subject Recruitment:** Parents will be recruited to complete two surveys during their visit to  
414 the practice. They will be asked to complete the 1) Intake Survey and 2) the Eligibility Screener  
415 and Exit Survey. These surveys will take place at two different times during the family’s visit to  
416 the doctor’s office.

417  
418 *Recruitment to complete the Intake Survey and receive additional tobacco cessation services:*  
419 (This protocol will occur at intervention practices ONLY.) When a parent checks in for their  
420 child’s visit, the front desk staff will ask parents to complete a brief intake survey on an iPad.  
421 This iPad will be provided to the practice by the study team for the duration of the study. When a  
422 parent checks in at the front desk upon arrival for their child’s visit, they will be handed the iPad  
423 and asked to answer a brief screener question that appears on the screen: “Does any member of  
424 your household use tobacco?”. Parents who select “Yes” will be asked to provide informed  
425 consent prior to completing the remainder of the questions on the survey. The consent language  
426 (attached separately) will inform parents that they will be asked to complete four questions, and  
427 that the information provided will be shared with their child’s doctor so that s/he may provide  
428 specialized tobacco services and resources. We are requesting a waiver for the requirement for  
429 written documentation of informed consent for this survey. Parents will be asked to review the  
430 consent language on the iPad and indicate their consent to complete the remaining questions on  
431 the Intake Survey by selecting *Yes* or *No* on the iPad. After parents have indicated their informed  
432 consent, they will complete the remainder of the Intake Survey questions (attached separately).  
433 Parents who do not provide consent will be prompted to give the iPad back to the front desk

434 staff. These parents will be eligible to consent to complete the Intake Survey at future visits  
435 during the 24 month study period if they so choose.

436  
437 *Recruitment to complete the Eligibility Screener and Exit Survey:* A notice will be posted at the  
438 patient registration window of all participating practices, informing all parents accompanying  
439 their children to office visits that the practice is participating in the research study. After being  
440 seen by the pediatric clinician and upon checking out, the parent will be directed to the RA  
441 stationed near the exit of the practice. The parent will be approached by the RA for an Eligibility  
442 Screener interview. The RA will ask all parents basic demographic questions and if they have  
443 “smoked a single cigarette, even a puff, in the past 7 days.” The RA will invite enrollment and  
444 obtain consent from those who screen positive for current smoking or are former smokers who  
445 quit in the last 2 years and meet other eligibility criteria (see above, Research Design and  
446 Objectives). The RA will administer a survey of additional demographic characteristics, tobacco-  
447 related services received at the visit, and tobacco behaviors as an Exit Interview for all enrollees.  
448 The RA will maximize confidentiality and privacy by administering the survey in the most  
449 private location possible, out of low-voice ear-shot of others. The survey instrument will be held  
450 in such a way that the parent can read it silently and silently indicate answers. Eligible parents  
451 will be offered an incentive worth \$5 for enrolling in the study. Enrolled participants who also  
452 provide a saliva sample will be offered an incentive worth \$20. Women will be well represented  
453 in the recruitment pool, as they comprise about 75% of the parents taking children to the  
454 pediatrician. To enhance recruitment of minorities and under-served populations, some  
455 recruitment materials state: “We strongly encourage practitioners who serve low income and  
456 minority populations to participate.”

457  
458 **6.2 Practice Recruitment:** To recruit pediatric practices, the AAP will use the same recruitment  
459 methodology they have used in their other studies. The AAP will recruit practices from a  
460 nationwide membership pool of 60,000 board certified pediatricians by utilizing standardized  
461 recruitment techniques that have yielded recruitment rates in excess of 25% in other AAP  
462 studies. These methods include e-mail contact, flyers, and articles in appropriate publications  
463 with subsequent phone and e-mail contact with interested parties. Recruitment materials  
464 (attached separately) will include a recruitment fax, tri-fold pamphlet, recruitment flyer,  
465 recruitment cold e-mail, one-page information sheet, and a formal letter of invitation to conduct  
466 the Practice Population Survey (PPS). Recruitment materials and information will also be  
467 available on a CEASE recruitment webpage that will be housed within the AAP Richmond  
468 Center website. This webpage will contain the information included on the 1-page Recruitment  
469 Information sheet included in this application, as well as have an embedded "prezi"-- a brief  
470 video presentation that also contains basic information about the study. The prezis is a media-  
471 based recruitment strategy that will allow a controlled message surrounding the study to be  
472 narrated using language adapted from other recruitment materials. It is designed to be used on  
473 the CEASE website to provide an introduction to interested clinicians. The webpage will also  
474 contain the contact information for AAP staff who will be doing the recruitment. Initial inclusion  
475 criteria will be described in recruitment materials and will include:

- 476 1. Presence of at least 4 FTE pediatricians
- 477 2. Self-described practice smoking rate of at least 15%
- 478 3. Average patient flow of 50 families per day/2000 families in the practice
- 479 4. Agreement by all clinicians (defined in the context of this study as anyone who sees  
480 their own patient panel such as a MD, Nurse Practitioner, or Physician’s Assistant) in the  
481 practice to introduce a practice-wide module for systemically addressing parental tobacco  
482 use (CEASE)

- 483 5. Current use of EHR  
484 6. Willingness to set up and use a disease registry  
485 7. Willingness to have a Research Assistant in the office setting  
486 8. A working fax machine  
487 9. Adequate geographical distance from other participating practices to minimize  
488 contamination effects  
489 10. Practices cannot have taken part in Phase 2 focus groups or other pilot tobacco  
490 control studies  
491 11. Practices must not be actively enrolling patients into other AAP trials.

492 It is estimated that approximately 30 practices will meet these criteria.

493  
494 Practices that meet initial inclusion criteria will be asked to administer a brief, anonymous  
495 Practice Population Survey (PPS) to all patient families seen during three consecutive days.  
496 Eligibility criteria for study enrollment include 1. Successful administration of the PPS and  
497 receipt of completed survey forms by study staff within 1 month of practice being recruited. 2.  
498 Agreement by all practice clinicians to host the study within the practice by signing the study  
499 consent form. 3. A combined smoking rate of at least 15% and practice size that will yield an  
500 average of at least 7.5 smokers per day. Randomization of two practices to the intervention or  
501 usual care control group will take place once three practices have been identified in 5 pre-  
502 determined states. Practices will be matched on practice size and parent smoking rate. One  
503 practice will be assigned to the replacement group after the two matched practices are randomly  
504 assigned to either the control or intervention. An additional state with 3 practices will be  
505 assigned to the replacement group.

506  
507 In order to determine that a practice is ready to host an RA for baseline data collection, the  
508 practice will need to meet the following two benchmarks, which will be shown using the Medical  
509 Records Review Sheet (attached separately). The benchmark review time will be scheduled with  
510 the practice leader by MGH staff:

- 511 1) At least 90% of patients with identified tobacco use in the household will have been  
512 given the CEASE Action Sheet, as determined by data from the Intake Survey. If a  
513 practice does not meet the 90% criteria, they will be given appropriate feedback and the  
514 benchmark review will be rescheduled.  
515 2) At least 60% of patients identified on the Intake Survey as having tobacco use in the  
516 household will have documentation of household tobacco use/exposure in the medical  
517 record. This data will be determined through the completion of the Medical Records  
518 Review Sheet (attached separately). This document, filled out by the practice leader, will  
519 ask them to select 10 names from their Disease Registry. The practice leader will review  
520 the medical record of each person he/she selects and indicate whether documentation of  
521 tobacco use or exposure in the household is present. If the practice does not meet the 60%  
522 criteria, they will be given appropriate feedback and the benchmark review will be  
523 rescheduled.

524  
525 After randomization, practices in the intervention and usual care control arms will be asked to  
526 determine an enrollment start date. Study staff will use practice preferences to schedule  
527 subsequent study activities (practice training tasks, recruitment and training of Research  
528 Assistants for exit interviewing and enrolling parents). Practices that fail to meet parent  
529 enrollment goals in a timely fashion will be replaced by a practice in the replacement group that  
530 also met the study inclusion criteria.

531  
532  
533  
534  
535  
536  
537  
538  
539  
540  
541  
542  
543  
544  
545  
546  
547  
548  
549  
550  
551  
552  
553  
554  
555  
556  
557  
558  
559  
560  
561  
562  
563  
564  
565  
566  
567  
568  
569  
570  
571  
572  
573  
574  
575  
576  
577  
578  
579

## **7. ADHERENCE TO ETHICAL GUIDELINES**

### **7.1 Consent procedures**

#### **7.1.1 Parents:**

There are two different types of consent for the parents, as follows:

In both intervention and control arm practices, parents will be consented for participation in the Exit Survey by the RA.

After completing the Eligibility Screener with parents, the RA will invite study enrollment of eligible parents according to a script located on the survey. The consent-request script is: “Would you be willing to be surveyed for a research study about families and smoking? Your participation is voluntary and will not affect your child’s care at this practice. If you agree to join the study, we would ask 20 short survey questions. The Exit Survey will take approximately 5 minutes. You will receive a gift valued at \$5 for completing these questions.”

If the parent says, “No,” the RA says, “OK. Thank you.” If the parent says “Yes,” the RA explains the study and shows the parent the consent form. The demographic responses will be used to track and report selection bias.

Before the parent or RA signs the consent form, the RA reads aloud the validation paragraph contained in it. This paragraph summarizes what the study entails for the parent: 1 survey; payment of cash or gifts valued at \$5 for completing the survey; a saliva sample and an additional \$20 incentive for people who qualify; and completely voluntary participation. If the parent agrees, he/she and the RA both sign 2 copies of the consent form. The parent keeps one, and the RA keeps the other to file. Parents will be protected from practice coercion for enrollment by the separation of the enrollment process implicit in the use of the Exit Survey, whose enrollment information is confidential and only know to the study staff at MGH and AAP.

In the intervention arm practices only, parents will consent on the iPad for their participation in the REDCap web-based Intake Survey. **We are requesting a waiver of the requirement for written documentation of informed consent for completion of the Intake Survey.** The intake survey presents no more than minimal risk of harm to subjects and involves no procedures for which written consent is normally required outside of the research context. The waiver of written documentation of informed consent will not adversely affect the rights and welfare of the subjects. The research could not practicably be carried out without the waiver. The consent procedure is such that subjects are provided with a written statement about the survey and the use of their data followed by a Yes/No button to click to indicate if they agree or decline participation to complete the remainder of the survey and allow their responses to be shared with their child’s doctor to provide their family with free resources and specialized services. The consent procedure we will use will have the consent language embedded into the intake survey to ensure that every parent who picks up the iPad and completes the online survey has received the opportunity to provide informed consent. Without the waiver of the requirement for written informed consent, the research team cannot be assured with certainty that the busy front desk staff would obtain written informed consent from every parent prior to completing the online survey. By embedding the consent language into the online survey itself, we are eliminating the possibility that a parent completes the online survey without giving informed consent. The administration of the online intake survey could not be practicably carried out without the waiver

580 in the pediatric office setting. Parent consent for the Intake Survey will be obtained on the iPad,  
581 as described above. We have applied for a waiver of the requirement for written documentation  
582 of informed consent for this portion of the study. Front desk staff will be trained to use an  
583 information sheet (attached separately to refer to in the event that parents have questions or  
584 concerns regarding the Intake Survey on the iPad. Front desk staff will be trained to refer to this  
585 sheet and will not provide specific informed consent related answers other than those listed here  
586

587

### 588 **7.1.2 Pediatric Clinicians**

589 Pediatric practices that have responded yes to participation and meet initial inclusion criteria will  
590 receive an invitation from the AAP to administer the Practice Population Survey (PPS) to  
591 confirm that the practice has a parent smoking rate  $\geq 15\%$ . The Practice Leader will identify  
592 him/herself on the Participation Form and fax back a response to the AAP. Practices will agree to  
593 distribute the Practice Population Survey (PPS) by responding “Yes” on the Participation Form  
594 they return to AAP in order to participate in this initial phase. Based on the results of the PPS,  
595 practices will then consent to participate in the study by signing the Clinician Consent Form. The  
596 Practice Leader will be the AAP contact practitioner and will describe the study to practice  
597 colleagues. The Clinician Consent Form describes study procedures, including agreement to  
598 randomization to either CEASE intervention, usual care control, or replacement status,  
599 acceptance of training (as appropriate based on condition), and acceptance to host the RA  
600 conducting exit interviews and consenting parents to the study.

601

602 In intervention practices, practice leaders and key office staff members will be asked to review  
603 the CEASE Interview Information Sheet prior to the qualitative interview. The CEASE Interview  
604 Information Sheet describes the purpose of the qualitative interview, as well as the respondent’s  
605 right to skip questions and the right to stop the interview at any time.

606

### 607 **7.2 Foreseeable risks and discomforts**

608 Risks to participating parents will be minimal. They include the potential discomfort of revealing  
609 personal tobacco use to pediatric office staff and the study RA. To minimize this discomfort and  
610 maximize privacy during the practice recruitment phase of the study, parents will be given the  
611 Practice Population Survey (PPS) to complete in writing. The form will have a wafer seal so that  
612 contents of completed surveys can be confidential when presented to the reception staff. (See  
613 recruitment procedures for additional details about administration of the PPS.) To reduce loss of  
614 time that could otherwise be spent on other productive activities, participants will be asked to  
615 spend approximately two minutes of time completing the PPS while waiting for their pediatric  
616 clinician.

617

618 Parents may also be uncomfortable discussing tobacco use with the pediatric clinician during the  
619 office visit. To maximize privacy and confidentiality, the protocol calls for such discussions to  
620 occur in the examining room, and for all records related to the parent’s smoking to be kept with  
621 the child’s personal medical records.

622

623 To maximize privacy for the exit interviews, RAs will speak to parents in the most private space  
624 available and in voices as quiet as possible. The RA will hold exit interview materials in such a  
625 way that the parent can read the questions silently and silently indicate which answers are  
626 appropriate. The Parent Consent Form includes a validation paragraph that specifies the major  
627 costs and benefits to the parent of study participation to help ensure understanding and follow-  
628 through.

629  
630 Enrolled parents reporting abstinence at the baseline and 2 year data collection time points will  
631 be asked to give saliva samples for testing to verify cessation. Parents will be assured that they  
632 can refuse to answer questions they do not want to answer, and that they can withdraw from the  
633 study at any time. Samples are obtained in a discreet manner and in the most private location  
634 possible within the office setting. The parent's unique, non-identifiable number is used to label  
635 the saliva sample. Any identifiable parent information is not recorded on the saliva sample to  
636 protect their confidentiality.

637  
638 Pediatric clinicians may experience some risk of alienating patients' parents who are  
639 uncomfortable discussing tobacco use and secondhand smoke (SHS) exposure of family  
640 members. Professional judgment is the only satisfactory arbiter in such cases. Parents may also  
641 be uncomfortable receiving follow-up tobacco cessation services based on their responses to the  
642 Intake Survey. This risk will be minimized by clearly explaining in the intake survey consent  
643 language (attached separately) that they may receive specialized follow-up services if they agree  
644 to provide their information.

645  
646 A household member may be identified on the Intake Survey as a tobacco user by another  
647 household member without their knowledge. The research team will not share this confidential  
648 information with any other parties except their child's pediatric practice as explained in informed  
649 consent section of the REDCap intake survey.

650  
651 Qualitative interview respondents (practice leader and key office staff in intervention practices)  
652 may experience slight discomfort during the qualitative interview (for intervention practices).  
653 Discomfort may result from being asked to provide feedback on the process of implementing  
654 CEASE in their practice. This risk will be minimized by clearly explaining at the start of the  
655 interview, as well as on the CEASE Interview Information Sheet, that all responses are  
656 anonymous and that the data will help improve the CEASE process. Respondents will be assured  
657 that they can refuse to answer questions they do not want to answer, that they can stop the  
658 interview at any time, and that they can withdraw from the study at any time.

### 659 660 **7.3 Expected benefits**

661 Carrying out this research in the pediatric outpatient setting will likely increase the provision of  
662 tobacco control services for parents who smoke. Increased provision of services has been proven  
663 to increase the chances of quitting smoking. Parents who successfully quit or reduce their  
664 tobacco consumption may live longer with a better quality of life, reduce the proven harms  
665 caused by tobacco exposure to their spouses and children, and have increased financial  
666 resources. Mothers who quit successfully may therefore be non-smokers for subsequent  
667 pregnancies, leading to better outcomes for their unborn children. Children of parents who quit  
668 have been shown to smoke at lower rates than those whose parents continue smoking.  
669 Counseling smokers about reducing others' SHS exposure may decrease morbidity and mortality  
670 associated with exposure not only for family members, but also people anywhere that might have  
671 been exposed inadvertently as a result of the smoker's lower pre-counseling awareness of SHS  
672 harms.

673  
674 In addition to benefits accruing to parents from increased service provision are benefits from  
675 participating in tobacco control studies. The background smoking cessation rate is estimated at  
676 2%-3%, but smokers who participate in and complete the placebo arms of tobacco control  
677 studies often achieve cessation rates that are double or triple this figure.

678  
679  
680  
681  
682  
683  
684  
685  
686  
687  
688  
689  
690  
691  
692  
693  
694  
695  
696  
697  
698  
699  
700  
701  
702  
703  
704  
705  
706  
707  
708  
709  
710  
711  
712  
713  
714  
715  
716  
717  
718  
719  
720  
721  
722  
723  
724  
725  
726

Pediatric clinicians who participate in the study will expand their skills in tobacco control counseling. They will also acquire tools to implement state-of-the-art tobacco control practices for their patients and families.

**7.4 Equitable selection of subjects**

The sample will be drawn from families attending practices distributed throughout the country affiliated with the American Academic of Pediatrics (AAP). The AAP has 59 chapters in the United States, each with a strong network of pediatric offices and clinicians interested in research. By working with a widely diverse set of practice communities, we have tried to maximize the equitable selection of subjects who are parents and who are pediatric clinicians. A comparison of AAP study visits with national data reveals striking similarities on patient gender, Hispanic ethnicity, Medicaid status, nature of visit (sick vs. well), presenting complaints, and physician diagnoses.

**8. DATA AND SAFETY MONITORING**

This is a minimal-risk study. Parents could be upset about discussing their tobacco use with the pediatric staff or the research staff and could be inconvenienced by the time taken to participate in the study. In pilot studies, this has not been a significant problem. Therefore, a Data Safety and Monitoring Board need not be convened.

**8.1. Safety monitoring**

Assessment. Participants will be assessed for adverse events at the time of enrollment, when the baseline survey data are received and reviewed, and at 2 years. The Principal Investigator, study coordinators and all members of the research staff are responsible for the assessment and reporting of adverse events. All spontaneous reports by subjects, observations by clinical research staff, and reports to research staff by family or healthcare providers will be investigated by the Steering Committee. The investigators will assess the relationship of the adverse event as not related, possibly related or definitely related using standard criteria for clinical trials.

Possible (to qualify, the adverse event must meet 2 of the following conditions):

- 1. has a reasonable temporal relationship to the intervention,
- 2. could not readily have been produced by the subject’s clinical state,
- 3. could not readily have been due to environmental or other interventions,
- 4. follows a known pattern of response to intervention, and/or
- 5. disappears or decreases with reduction in cessation of intervention.

Probable (to qualify, the adverse event must meet 3 of the following conditions):

- 1. has a reasonable temporal relationship to the intervention,
- 2. could not readily have been produced by the subject’s clinical state,
- 3. could not readily have been due to environmental or other interventions,
- 4. follows a known pattern of response to intervention, and/or
- 5. disappears or decreases with reduction in cessation of intervention.

Definite (to qualify, the adverse event must meet at least 4 of the following conditions):

- 1. has a reasonable temporal relationship to the intervention,
- 2. could not readily have been produced by the subject’s clinical state,
- 3. could not readily have been due to environmental or other interventions,
- 4. follows a known pattern of response to intervention, and/or
- 5. disappears or decreases with reduction in cessation of intervention.

727 Adverse Event Definitions:  
728 Adverse Event: an undesirable and unintended result of therapy, intervention or interaction  
729 experienced by a subject participating in a research study.  
730 Unexpected Adverse Event: any adverse event, the specificity, severity, frequency or nature of  
731 which is not consistent with the current general investigational protocol or investigational  
732 protocol amendments.  
733 Serious Adverse Event: any adverse event that results in any of the following outcomes: death, a  
734 life-threatening adverse event, inpatient hospitalization or prolongation of existing  
735 hospitalization, a persistent or significant disability/incapacity, or a congenital anomaly/birth  
736 defect. Important medical events that may not result in death, may not be life threatening or may  
737 not require hospitalization could be considered serious adverse events when, based upon  
738 appropriate medical judgment, they may jeopardize the patient or subject and may require  
739 medical or surgical intervention to prevent one of the outcomes listed in this definition. Due to  
740 the minimal risk nature of this intervention, in which we collect data only through surveys and  
741 administer no medications, we do not expect serious adverse events, such as death.  
742 Potential adverse events that could result from the study include a participant feeling  
743 uncomfortable answering interview questions and choosing to discontinue participation. This is  
744 clearly stated in the informed consent and assent.  
745 Adverse Event Reporting: An *FDA Medwatch Form* will be used to report all Adverse Events. A  
746 copy of the adverse event report will be retained with the subject's research records.  
747 *Serious Adverse Events* must be reported in writing within 7 calendar days of any member of the  
748 investigative team becoming aware of such an event. These adverse events would be reported to  
749 the IRB, the American Academy of Pediatrics IRB, and NCI.  
750 *Unexpected Adverse Events* must be reported in writing within 15 calendar days of any member  
751 of the investigative team becoming aware of such an event.  
752 Management of Reported Adverse Events: The PI and the study team are responsible for the  
753 appropriate clinical management of all adverse events. The PI will ensure that all appropriate  
754 resources are directed toward subject safety and well-being. Any subject may unenroll or  
755 discontinue the study at any time at their own discretion or if in the opinion of any study staff,  
756 their safety or well-being is jeopardized by continued participation in the study.

757

## 758 **8.2 Monitoring and quality assurance**

759 All study data will be aggregated and prepared for analysis at the Massachusetts General  
760 Hospital Data Coordinating Center (MGH DCC) by the Data Manager (DM) and Research  
761 Assistant (RA). The DM will utilize the REDCap database to house all data collected. Any  
762 additional database used to conduct analysis will reside on a password-protected network drive at  
763 MGH accessible only to study staff. The DM will meet weekly with the Project Director to  
764 review data accrual and quality issues.

765

## 766 **8.3 Privacy and confidentiality**

767 Codes will be substituted for names on all materials prior to entering them into the analytic  
768 database. The parent consent form will include authorization for MGH to connect names with  
769 coded identifiers for data quality assurance of Exit Survey data. The unique enrollment code  
770 number of the Exit Survey associated with individual consents will be entered on the consent  
771 form by the RA.

772

773 Practice Clinician Consent forms will be stored in locked cabinets on a secure floor at the AAP  
774 central office. Practices will store their copies of consent forms in a secure location. All study  
775 forms will be kept for 10 years, and then destroyed. Practice clinicians will use their assigned



776 AAP ID number, rather than their names, to identify surveys. This will protect their  
777 confidentiality.

778

## 779 **8.4 Specimens**

### 780 **8.4.1 Sending specimens/data to research collaborators outside partners**

781 The participant's code number will be used to identify saliva samples sent to the laboratory for  
782 the cotinine analysis. No identifying information will be given to the testing laboratory.

783 Data will not be stored at collaborating sites outside of Partners for future use not described in  
784 the protocol. Subjects will not be able to withdraw their data.

785

### 786 **8.4.2 Receiving specimens/data from research collaborators outside partners**

787 Data collected by the Research Assistants in the Exit Survey will be identifiable when it is  
788 received at MGH. This is necessary so that data quality can be monitored and potentially  
789 matched by parent with data collected at 24 months. The consent form will inform parents of this  
790 fact, and also of the de-identifying procedure that will occur when the data are entered into the  
791 analytic database. Data collected from pediatric clinicians collected by the AAP will not contain  
792 personal identifiers that could be used by MGH investigators to link to individual subjects.

793

794 The AAP study staff will have access to Intake Survey Report Follow-up Data. This data will be  
795 identified by the practice's Study ID number (not by clinician name) and will be housed in a  
796 secure database accessible only to study staff.

797

## 798 **9. REFERENCES**

799

- 800 **1.** Taylor BV, Oudit GY, Kalman PG, Liu P. Clinical and pathophysiological effects of  
801 active and passive smoking on the cardiovascular system. *Canadian Journal of*  
802 *Cardiology*. 1998;14(9):1129-1139.
- 803 **2.** Wilson KM, Klein JD, Blumkin AK, Gottlieb M, Winickoff JP. Tobacco-smoke exposure  
804 in children who live in multiunit housing. *Pediatrics*. Jan 2011;127(1):85-92.
- 805 **3.** Johansson A, Hermansson G, Ludvigsson J. How should parents protect their children  
806 from environmental tobacco-smoke exposure in the home? *Pediatrics*. 2004;113(4):e291-  
807 295.
- 808 **4.** Matt GE, Quintana PJ, Hovell MF, et al. Households contaminated by environmental  
809 tobacco smoke: sources of infant exposures. *Tobacco control*. Mar 2004;13(1):29-37.
- 810 **5.** Winickoff JP, Healey EA, Regan S, et al. Using the postpartum hospital stay to address  
811 mothers' and fathers' smoking: the NEWS study. *Pediatrics*. Mar 2010;125(3):518-525.
- 812 **6.** Aligne CA, Stoddard JJ. An economic evaluation of the medical effects of parental  
813 smoking. *Arch Pediatr Adolesc Med*. 1997;151:648-653.
- 814 **7.** Centers for Disease Control and Prevention. Nonfatal residential fire-related injuries  
815 treated in emergency departments--United States, 2001. *MMWR. Morbidity & Mortality*  
816 *Weekly Report*. 2003;52(38):906-908.
- 817 **8.** Farkas AJ, Distefan JM, Choi WS, Gilpin EA, Pierce JP. Does parental smoking  
818 cessation discourage adolescent smoking? *Preventive Medicine*. 1999;28(3):213-218.
- 819 **9.** Farkas AJ, Gilpin EA, White MM, Pierce JP. Association between household and  
820 workplace smoking restrictions and adolescent smoking. *JAMA*. 2000;284(6):717-722.
- 821 **10.** Robinson LA, Klesges RC, Zbikowski SM. Gender and ethnic differences in young  
822 adolescents' sources of cigarettes. *Tobacco control*. Winter 1998;7(4):353-359.
- 823 **11.** Winickoff JP, Berkowitz AB, Brooks K, et al. State-of-the-art interventions for office-  
824 based parental tobacco control. *Pediatrics*. Mar 2005;115(3):750-760.

- 825 **12.** Newacheck PW, Stoddard JJ, Hughes DC, Pearl M. Health insurance and access to  
826 primary care for children. *The New England journal of medicine*. 1998;338(8):513-519.
- 827 **13.** Fiore MC, Bailey WC, Cohen SJ. *Treating Tobacco Use and Dependence*. Rockville,  
828 MD: US Department of Health and Human Services, Public Health Service;2000.
- 829 **14.** Rigotti NA. Clinical practice. Treatment of tobacco use and dependence. *The New*  
830 *England journal of medicine*. 2002;346(7):506-512.
- 831 **15.** Rowland D, Lyons B, Salganicoff A, Long P. A profile of the uninsured in America.  
832 *Health Aff (Millwood)*. 1994;13(2):283-287.
- 833 **16.** Winickoff JP, Buckley VJ, Palfrey JS, Perrin JM, Rigotti NA. Intervention with parental  
834 smokers in an outpatient pediatric clinic using counseling and nicotine replacement.  
835 *Pediatrics*. Nov 2003;112(5):1127-1133.
- 836 **17.** Fiore MC, Jaen CR, Baker TB. *Treating tobacco use and dependence:2008 Update*.  
837 Rockville, MD: U.S. Department of Health and Human Services. Public Health  
838 Service;May 2008.
- 839 **18.** Rosen LJ, Ben Noach M, Winickoff JP, Hovell MF. Parental smoking cessation to  
840 protect young children: a systematic review and meta-analysis. *Pediatrics*. 2011;In Press.
- 841 **19.** Winickoff JP, Hibberd PL, Case B, Sinha P, Rigotti NA. Child hospitalization: an  
842 opportunity for parental smoking intervention. *American journal of preventive medicine*.  
843 Oct 2001;21(3):218-220.
- 844 **20.** Winickoff JP, Hillis VJ, Palfrey JS, Perrin JM, Rigotti NA. A smoking cessation  
845 intervention for parents of children who are hospitalized for respiratory illness: the stop  
846 tobacco outreach program. *Pediatrics*. Jan 2003;111(1):140-145.
- 847 **21.** Winickoff JP, McMillen RC, Carroll BC, et al. Addressing parental smoking in pediatrics  
848 and family practice: a national survey of parents. *Pediatrics*. Nov 2003;112(5):1146-  
849 1151.
- 850 **22.** Winickoff JP, Tanski SE, McMillen RC, Hipple BJ, Friebely J, Healey EA. A national  
851 survey of the acceptability of quitlines to help parents quit smoking. *Pediatrics*. Apr  
852 2006;117(4):e695-700.
- 853 **23.** Winickoff JP, Tanski SE, McMillen RC, Klein JD, Rigotti NA, Weitzman M. Child  
854 health care clinicians' use of medications to help parents quit smoking: a national parent  
855 survey. *Pediatrics*. Apr 2005;115(4):1013-1017.
- 856 **24.** Scheirer MA, Dearing JW. An Agenda for Research on the Sustainability of Public  
857 Health Programs. *American journal of public health*. Sep 22 2011.
- 858 **25.** Glasgow RE. What types of evidence are most needed to advance behavioral medicine?  
859 *Annals of behavioral medicine : a publication of the Society of Behavioral Medicine*. Feb  
860 2008;35(1):19-25.
- 861 **26.** Residents of all 50 states have access to quitlines. Home page.  
862 <http://www.naquitline.org/>. Accessed September 17, 2011.
- 863 **27.** Mann C. New Medicaid Tobacco Cessation Services. In: Center for Medicaid C, and  
864 Survey & Certification, ed. Vol SDL #11-007June 2011.
- 865 **28.** Winickoff JP, Dempsey JH, Friebely J, Hipple B, Lazorick S. EQIPP: Eliminate Tobacco  
866 Use and Exposure. *Pedialink*. 2011;American Academy of Pediatrics.
- 867 **29.** Shediach-Rizkallah MC, Bone LR. Planning for the sustainability of community-based  
868 health programs: conceptual frameworks and future directions for research, practice and  
869 policy. *Health education research*. Mar 1998;13(1):87-108.
- 870  
871  
872  
873

**APPENDIX 1: MAIN OUTCOMES MEASUREMENT**

| <b>Outcomes</b>                                                                                                             | <b>Operational Definition and Assessment Method</b>                                                                                                                                                                                                                                                       | <b>Timing</b>                                                      |
|-----------------------------------------------------------------------------------------------------------------------------|-----------------------------------------------------------------------------------------------------------------------------------------------------------------------------------------------------------------------------------------------------------------------------------------------------------|--------------------------------------------------------------------|
| <b>H1. Clinician Behavior</b><br>Delivering cessation assistance<br>(Primary Outcome for Aim #1)                            | <b>Assessed by Exit Survey of parents*</b><br>Percentage of parental smokers who received any of the following 1. Prescription of pharmacotherapy Or 2. Referral to quitline, local program, or website.                                                                                                  | Baseline and 2 years                                               |
| Screening for parental smoking                                                                                              | Percentage of all parents seen in practice who are screened for smoking status                                                                                                                                                                                                                            | Baseline and 2 years                                               |
| Advising parents to quit                                                                                                    | Percentage of parental smokers advised to quit smoking during                                                                                                                                                                                                                                             | Baseline and 2 years                                               |
| Counseling parents about rules                                                                                              | Percentage of parental smokers counseled about home and car smoking prohibition                                                                                                                                                                                                                           | Baseline and 2 years                                               |
| <b>H2. Patient Behavior and Return on Investment</b>                                                                        | <b>Assessed by Exit Survey of parents*</b>                                                                                                                                                                                                                                                                |                                                                    |
| Currently smoking parents                                                                                                   | Change in prevalence of parental smokers who report smoking currently from baseline to 2 years                                                                                                                                                                                                            | Baseline, 2 years                                                  |
| 7-day abstinence                                                                                                            | Change in percentage of parental smokers who have 7-day abstinence from baseline to 2 years (biochemically verified at Baseline and 2 years)                                                                                                                                                              | Baseline, 2 years                                                  |
| Quit attempts                                                                                                               | Percentage of parental smokers who report at least one 24-hour quit attempt in past 3 months                                                                                                                                                                                                              | Baseline, 2 years                                                  |
| Use of pharmacotherapy                                                                                                      | Percentage of parental smokers who report use of medication to help them quit smoking in past 2 years                                                                                                                                                                                                     | Baseline, 2 years                                                  |
| Receipt of tobacco control services from the program                                                                        | Percentage of parental smokers who received telephone counseling or other services                                                                                                                                                                                                                        | Baseline, 2 years                                                  |
| Institution of smoking bans                                                                                                 | Percentage of parental smokers who report strict rules prohibiting smoking anywhere inside their home and car                                                                                                                                                                                             | Baseline, 2 years                                                  |
| <b>H3. Practice Implementation, Maintenance and Sustainability</b><br>Practice integration of tobacco control office system | <b>Assessed by regular practice feedback and communication with Practice Leader</b><br>Regular feedback will be gathered from clinicians in the form of the online module and phone contact as a back-up method as a back-up method.<br>Qualitative interviews with practice leader and key office staff. | Pre-intervention (baseline) and regularly throughout intervention. |

876 \*parents or legal guardians

880  
881  
882  
883  
884  
885  
886  
887  
888  
889  
890  
891  
892  
893  
894  
895  
896  
897  
898  
899  
900  
901  
902  
903  
904  
905  
906  
907  
908  
909  
910  
911  
912  
913  
914  
915  
916  
917  
918  
919  
920  
921  
922  
923  
924  
925  
926  
927  
928  
929

## **APPENDIX 2: POWER CALCULATIONS.**

Our sample size calculations assume  $\alpha=.05$ ,  $1-\beta$  (power)  $=.80$ , two-tailed test of significance, and 10 practices completing the study. Recruiting 15 practices (3 practices in each of 5 states) to get 10 that complete the study is easily attainable given the over 5,000 practices in the AAP network and the proven ability of past study recruitment efforts. A clinically important and conservative estimate of validated 24-month quit rates given the results of prior studies<sup>1-7</sup> is 7.5% in the control group and 12.5% in the intervention group, which requires a total sample size of 1190. With the assumptions of an intra-class correlation of .017 (based on the mean value from a previous study<sup>8</sup>) and a total of 60 providers, we estimated we need a total of 1844 participants to take into account of the clustering effect. We plan to enroll approximately 200 participants from each practice to achieve adequate power.

1. Curry SJ, Ludman EJ, Graham E, Stout J, Grothaus L, Lozano P. Pediatric-based smoking cessation intervention for low-income women: a randomized trial. *Archives of Pediatrics & Adolescent Medicine*. 2003;157(3):295-302.
2. Eriksen W, Sorum K, Bruusgaard D. Effects of information on smoking behaviour in families with preschool children. *Acta Paediatr*. 1996;85(2):209-212.
3. Wilson SR, Yamada EG, Sudhakar R, et al. A controlled trial of an environmental tobacco smoke reduction intervention in low-income children with asthma. *Chest*. 2001;120(5):1709-1722.
4. Abdullah AS, Mak YW, Loke AY, Lam TH. Smoking cessation intervention in parents of young children: a randomised controlled trial. *Addiction (Abingdon, England)*. Nov 2005;100(11):1731-1740.
5. Chan SS, Lam TH, Salili F, et al. A randomized controlled trial of an individualized motivational intervention on smoking cessation for parents of sick children: a pilot study. *Appl Nurs Res*. Aug 2005;18(3):178-181.
6. Hovell MF, Zakarian JM, Matt GE, et al. Counseling to reduce children's secondhand smoke exposure and help parents quit smoking: a controlled trial. *Nicotine & tobacco research : official journal of the Society for Research on Nicotine and Tobacco*. Dec 2009;11(12):1383-1394.
7. Wilson SR, Farber HJ, Knowles SB, Lavori PW. A randomized trial of parental behavioral counseling and cotinine feedback for lowering environmental tobacco smoke exposure in children with asthma: results of the LET'S Manage Asthma trial. *Chest*. Mar 2011;139(3):581-590.
8. Martinson BC. Intraclass correlation for measures from a worksite health promotion study: estimates, correlates, and applications. *Am J Health Promot*. Mar-Apr 2000;14(4):271.

### **APPENDIX 3: STATISTICAL ANALYSES**

**H1. Rates of cessation assistance delivery, assessed by the Exit Survey at baseline (post-implementation) and 2 years will be greater level in the intervention practices than in controls.** The primary outcome is delivery of cessation assistance (see Appendix 1 above for construct) in intervention practices vs. control. We will calculate the mean decrement or increase in cessation assistance from baseline to 24 months in the intervention condition as the primary measure of sustainability. We will build a logistic regression model that includes group, time (baseline and 24 months) and group by time interaction to compare the change in clinician behavior for the intervention and control practices. In addition, these models will include potential confounding factors that are imbalanced between intervention and control groups. To account for the clustering by physician and practice, we will employ the Generalized Estimating Equations (GEE) approach or the generalized mixed effects model approach with the logistic regression models. Rates of clinician asking about smoke-free homes and cars will follow a similar analysis strategy.

**H2. Rates of change in parent behaviors as assessed by exit survey at baseline (post-implementation) and 2 years will be greater in intervention practices than in usual care control practices:**

The change in practice-level current smoking rate from baseline to 2-years will be compared in the control practices and intervention practices at 24-month follow-up time period. Rates of change in 7-day cotinine confirmed quit rate will also be compared in the control practices and intervention practices from baseline to 24-month follow-up time period. Only self-reported non-smokers who have cotinine values  $\leq 10$  ng/ml, a consensus cutoff level and who report using NRT in the past 7 days will be considered quit.<sup>1,2</sup> We will use multiple imputation techniques to impute missing outcomes as a sensitivity analysis. We will follow a similar analysis strategy to that stated above in Aim #1.

In addition, we will calculate a primary cost-per-quit endpoint from the societal perspective using well-accepted, state-of-the-science cost-effectiveness methods previously used by our team.<sup>4-9</sup>

The incremental cost per quit of the CEASE intervention will be estimated as (total cost at 24 months for CEASE-total costs for standard care)/(Total cotinine confirmed quits at 24 months for CEASE-total cotinine confirmed quits at 24 months for standard care). Exploratory analyses will also consider the incremental costs associated with sustaining the intervention beyond the first year, by measuring costs (from months 19 to 24) and sustainability [measured by level (%) given quitting assistance at 24-months]. Development costs for CEASE will not be included because the intervention already exists; instead we will calculate the cost of implementing and sustaining the systems changes that yield a given level of service delivery and cessation. Direct costs include the CEASE intervention staff time to support the practice leader and time pediatricians and office staff take to learn how to use the online module, NRT, monthly materials, newsletter, listserv monitoring and maintenance. It is expected that initial trainings and materials (implementation) will be greater than the costs to maintain the intervention over time. We will use Monte Carlo simulation methods to develop confidence bounds on our cost-per-quit estimates. Following standard methods of economic evaluation as we have done in other studies, we will also perform parameter-specific sensitivity analyses in which individual parameters are varied singly and in combination, through plausible ranges to assess the relative impact different elements of the program have on overall cost-effectiveness.<sup>8-10</sup>

**H3 Leadership support, EHR integration, program institutionalization, and environmental factors (quitline accessibility, billing for services) will correlate with delivery of cessation**

979 **assistance.** In exploratory fashion individual practice sustainability will be assessed using  
980 regular practice feedback from the online module to determine what factors may account for  
981 higher or lower levels of sustainability. Leadership support, EHR integration, program  
982 institutionalization, community and environmental factors (quitline accessibility, local smokefree  
983 laws, billing for services) will be correlated with delivery of cessation assistance and each  
984 practices' sustainability rank. *All component processes (including exploratory implementational,*  
985 *organizational, and environmental sustainability factors)* have been added to the online module  
986 as an ongoing self-monitoring feature to improve and study key components of module use  
987 patterns as well as adoption, implementation, and maintenance of the intervention in this trial.  
988 Process results will therefore be used as feedback to practices at the three time points (after  
989 completion of each instance of practice feedback). Other proposed measures of sustainability  
990 such as dissemination or actual secondary spread to other satellite sites will be tracked and  
991 reported as part of the sustainability outcomes analysis.

- 992
- 993 1. Benowitz NL, Jacob P, 3rd, Ahijevych K, et al. Biochemical verification of tobacco use and  
994 cessation. *Nicotine Tob Res.* 2002;4(2):149-159.
  - 995 2. Benowitz NL, Bernert JT, Caraballo RS, Holiday DB, Wang J. Optimal serum cotinine levels for  
996 distinguishing cigarette smokers and nonsmokers within different racial/ethnic groups in the  
997 United States between 1999 and 2004. *Am J Epidemiol.* Jan 15 2009;169(2):236-248.
  - 998 3. Curry SJ, Grothaus LC, McAfee T, Pabiniak C. Use and cost effectiveness of smoking-cessation  
999 services under four insurance plans in a health maintenance organization. *New England Journal*  
1000 *of Medicine.* 1998;339(10):673-679.
  - 1001 4. Drummond MF, Sculpher M, Torrance GW, O'Brien B, Stoddart GL. *Methods for the Economic*  
1002 *Evaluation of Health Care Programmes.* Third ed. New York: Oxford University Press; 2005.
  - 1003 5. Gold MR, Siegel JE, Russell LB, Weinstein MC, eds. *Cost Effectiveness in Health and Medicine.*  
1004 New York: Oxford University Press; 1996.
  - 1005 6. Warner KE. The costs of benefits: smoking cessation and health care expenditures. *Am J Health*  
1006 *Promot.* Nov-Dec 2003;18(2):123-124, ii.
  - 1007 7. Cromwell J, Bartosch WJ, Fiore MC, Hasselblad V, Baker T. Cost-effectiveness of the clinical  
1008 practice recommendations in the AHCPR guideline for smoking cessation. Agency for Health  
1009 Care Policy and Research. [see comments]. *JAMA.* 1997;278(21):1759-1766.
  - 1010 8. Rigotti N, Bitton A, Kelley J, Hoepfner B, Levy DE, Mort E. Population-based direct-to-smoker  
1011 outreach offering tobacco treatment in a health care setting: a randomized controlled trial. . *Am J*  
1012 *Prev Med.* 2011;in press.
  - 1013 9. Levy DE. Employer-sponsored insurance coverage of smoking cessation treatments. *Am J Manag*  
1014 *Care.* Sep 2006;12(9):553-562.
  - 1015 10. Warner KE, Smith RJ, Smith DG, Fries BE. Health and economic implications of a work-site  
1016 smoking-cessation program: a simulation analysis. *Journal of Occupational & Environmental*  
1017 *Medicine.* 1996;38(10):981-992.
- 1018
