# Supplementary material
Source: PubMed Central journal article supplement (PMC6692696)
Supplement: jamapediatr-173-931-s002.pdf [file jamapediatr-173-931-s002.pdf]

Nabi-Burza et al. Treating parents for tobacco use in the pediatric setting: the clinical effort against secondhand smoke exposure cluster-randomized controlled trial. *JAMA Pediatr*. Published online August 12, 2019. doi:10.1001/jamapediatrics.2019.2639

### **Data Sharing Statement**

#### **Data**

**Data available:** Yes

**Data types:** Deidentified participant data

**How to access data:** jwinickoff@mgh.harvard.edu

**When available:** With publication

#### **Supporting Documents**

**Document types:** None

#### **Additional Information**

**Who can access the data:** After reviewing the proposal of the researcher requesting the data

**Types of analyses:** for any purpose

**Mechanisms of data availability:** after approval of a proposal

**Any additional restrictions:** none
